# Supplementary material
Source: publisher figshare collection journal article supplement (https://acs.figshare.com/ndownloader/files/9523459)
Supplement: Supplementary file 1 [file 9523459]

# Supplemental Information

## Enhanced Quality CVD-Grown Graphene via a Double-Plateau Copper Surface Planarization Methodology

*Mark H. Griep<sup>1\*</sup>, Travis M. Tumlin<sup>1</sup>, Joshua T. Smith<sup>2</sup>, Satoshi Oida<sup>2</sup>, Tomoko Sano<sup>1</sup>, Derek Demaree<sup>1</sup>, and Christos Dimitrakopoulos<sup>3</sup>*

<sup>1</sup>U.S. Army Research Laboratory, 4600 Deer Creek Loop, APG, MD 21005.

<sup>2</sup>IBM T.J. Watson Research Center, 1101 Kitchawan Rd., Yorktown Heights, NY 10598.

<sup>3</sup>Department of Chemical Engineering, University of Massachusetts Amherst, MA 01003.

**Electropolishing polarization scan.** Polarization scans were performed on a Struers Lectropol 5 automatic electropolishing unit to isolate the plateau regions where optimized surface planarization occurs. Copper foil sample areas of 5 cm<sup>2</sup> were scanned from 0 to 10V in 0.1V increments in an electrolyte composed of 330 mL dI H<sub>2</sub>O, 167 mL ortho-phosphoric acid, 167 mL ethanol, 33 mL isopropyl alcohol, and 3.3 g urea; monitoring the output current at each voltage. The output polarization sweep is shown in Figure S1, with plateau regions highlighted. Specific plateau regions of 1.5-2.1 V, similar to that utilized in previous studies, and the elevated voltage range of 7.5-8.2 V are present.

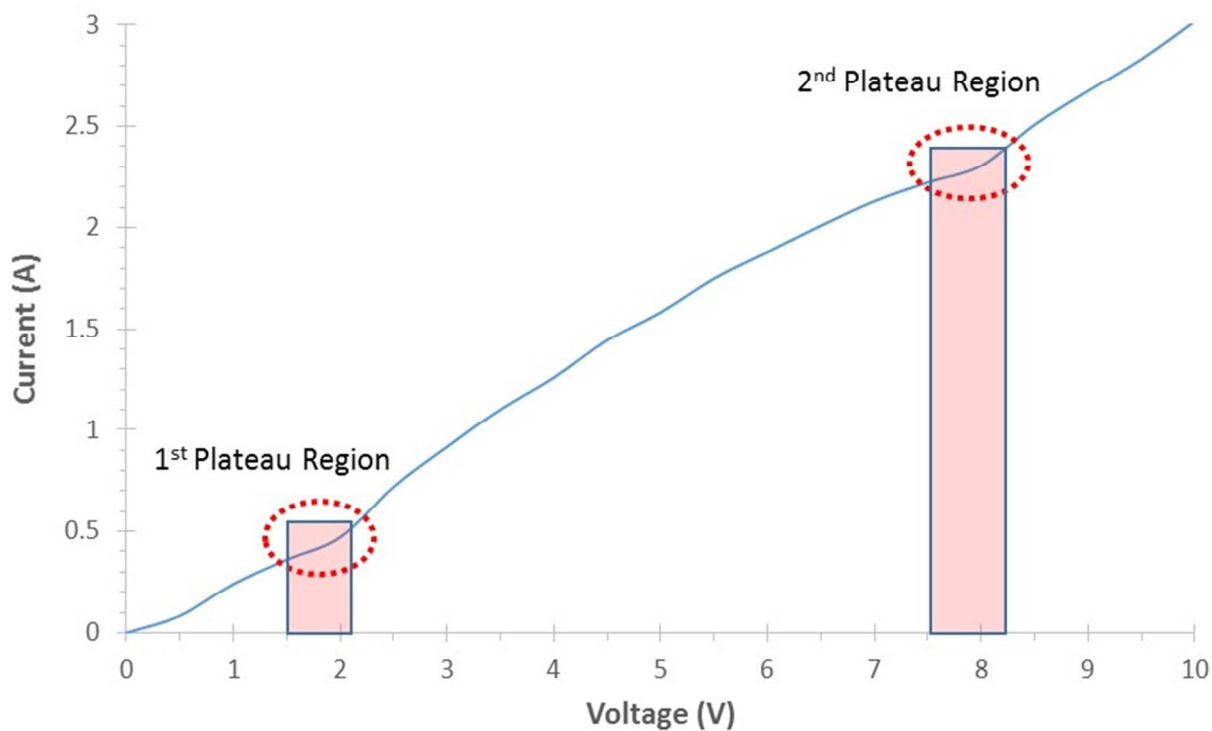

**Figure S1. Polarization curve highlighting plateau regions for optimal electropolishing setpoints.**

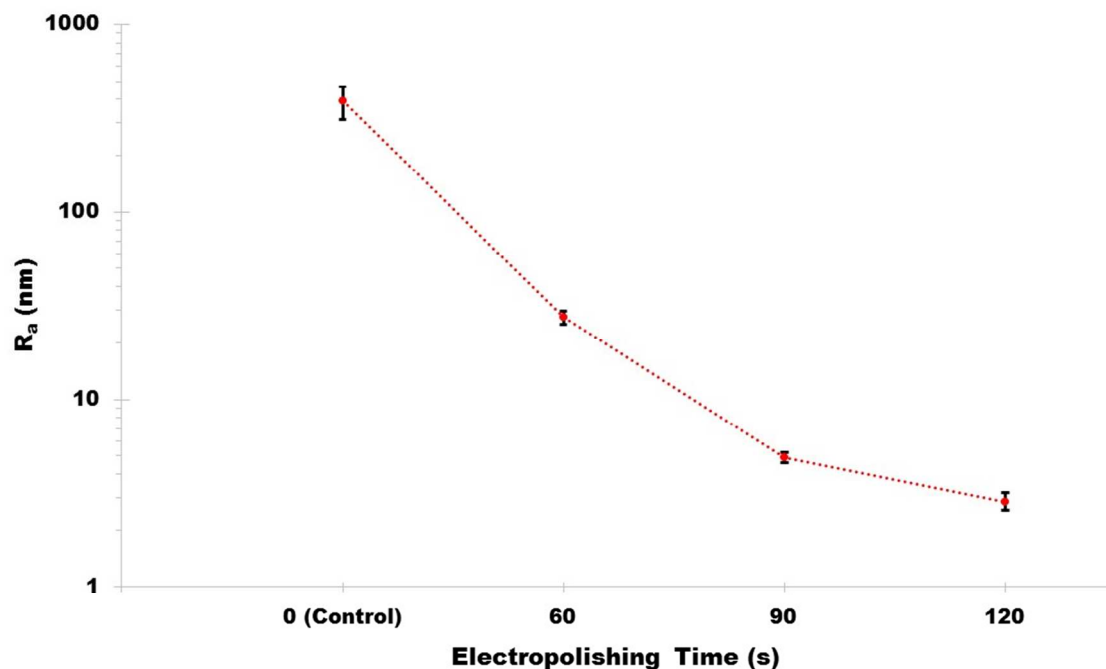

Figure S2. Roughness ( $R_a$ ) measurements of copper growth substrates at select electropolishing conditions. Error bars indicate the 95% confidence interval.

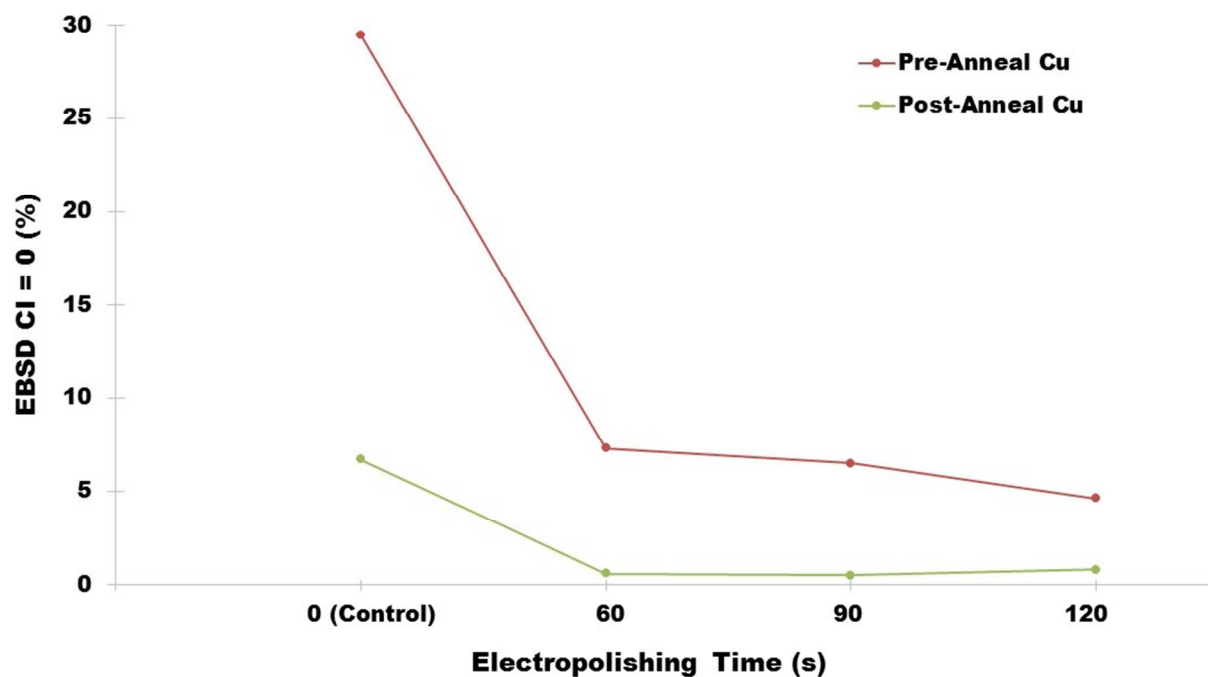

Figure S3. EBSD fraction of points at  $CI=0$  for Cu foils after select electropolishing durations, both pre and post-annealing.
